# Supplementary material for: The impact of complaints procedures on the welfare, health and clinical practise of 7926 doctors in the UK: a cross-sectional survey
Source: HighWire-hosted journal article supplement (doi:10.1136/bmjopen-2014-006687), 2015-01-01

## Supplementary online material

Supplementary figure 1: Effect of type of complaint on hedging behavior by origin of complaint.

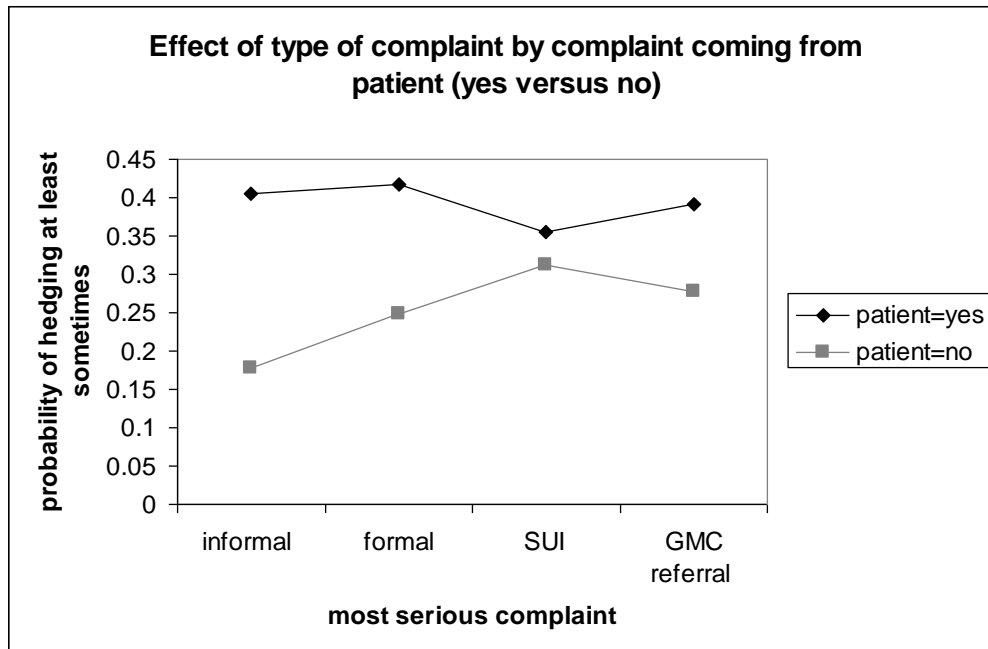

Supplement: bmjopen-2014-006687supp_figure.pdf [file bmjopen-2014-006687supp_figure.pdf]
